# Supplementary material for: Characterization of MATE Gene Family And Its Role In Drought, Heat, And Salt Tolerance In Wheat (Triticum Aestivum L.)
Source: Research Square preprint supplement (doi:10.21203/rs.3.rs-880815/v1), 2021-09-21
Supplement: Supplementary file 1 [file d1f27858a513223f9819c381.docx]

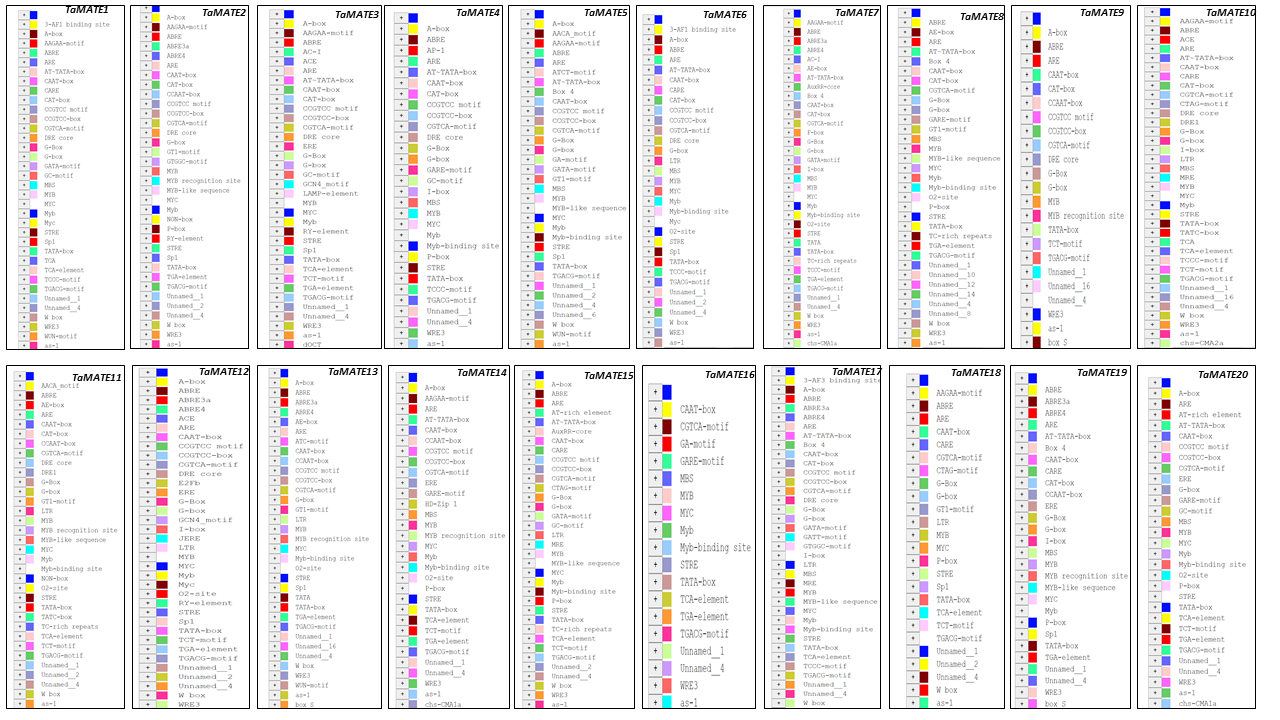


**Fig. S1:** Cis-elements analysis of 20 *TaMATEs*, gene promoters in *Triticum aestivum* L. The potential cis-regulatory elements in the promoter region 2,000 bp upstream of *Triticum aestivum* L. were predicted by PlantCARE software. Different colours indicated the elements related to growth and development, plant hormones, and stress responsiveness.
